# Supplementary material for: Na2FePO4F cathode utilized in hybrid-ion batteries: a mechanistic exploration of ion migration and diffusion capability
Source: Royal Society of Chemistry journal article supplement (doi:10.1039/c3ta14472k), 2014-01-01
Supplement: c3ta14472k.pdf [file c3ta14472k.pdf]

## Supporting Information

# **Na<sub>2</sub>FePO<sub>4</sub>F Cathode Utilized in Hybrid-ion Batteries: A Mechanistic Exploration of Ion Migration and Diffusion Capability**

**Weixin Song,<sup>a</sup> Xiaobo Ji,<sup>\*a</sup> Zhengping Wu,<sup>a</sup> Yirong Zhu,<sup>a</sup> Yinpeng Yao,<sup>a</sup> Kaili Huangfu,<sup>a</sup> Qiyuan Chen,<sup>a</sup> and Craig E Banks<sup>\*b</sup>**

<sup>a</sup> *Key Laboratory of Resources Chemistry of Nonferrous Metals, Ministry of Education, College of Chemistry and Chemical Engineering, Central South University, Changsha, 410083, China. Fax: (+86)731 88879616; E-mail: xji@csu.edu.cn*

<sup>b</sup> *Faculty of Science and Engineering, School of Science and the Environment, Division of Chemistry and Environmental Science, Manchester Metropolitan University, Chester Street, Manchester M1 5GD, Lancs, UK. Fax: +44(0)1612476831; E-mail: c.banks@mmu.ac.uk*

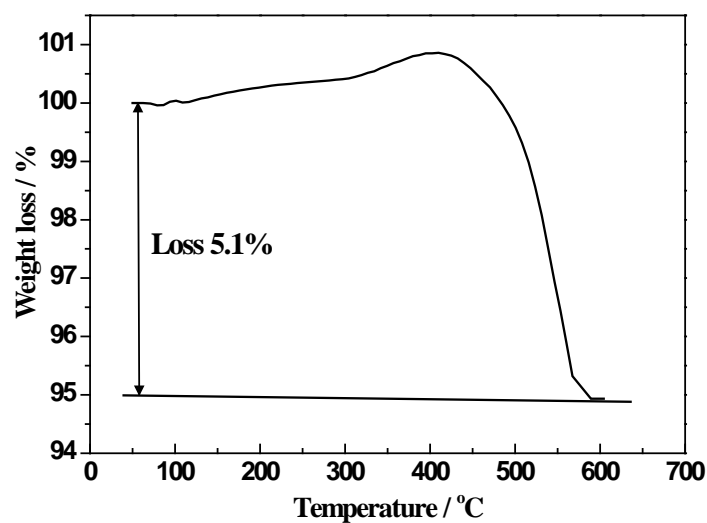

Fig. S1 TG curves of Na<sub>2</sub>FePO<sub>4</sub>F/C composite fired in air condition.

Table S1 Bond population of O-Na in the optimized cell.

| Bond            | Population | Length (Å) |
|-----------------|------------|------------|
| O 015 -- Na 003 | 0.17       | 2.24567    |
| O 007 -- Na 007 | 0.17       | 2.24576    |
| O 023 -- Na 015 | 0.17       | 2.24631    |
| O 031 -- Na 011 | 0.17       | 2.24639    |
| O 003 -- Na 005 | 0.17       | 2.24810    |
| O 011 -- Na 001 | 0.17       | 2.24828    |
| O 027 -- Na 009 | 0.17       | 2.24869    |
| O 019 -- Na 013 | 0.17       | 2.24883    |
| O 026 -- Na 014 | 0.16       | 2.29904    |
| O 018 -- Na 010 | 0.16       | 2.29905    |
| O 010 -- Na 006 | 0.16       | 2.29907    |
| O 002 -- Na 002 | 0.16       | 2.29908    |
| O 030 -- Na 016 | 0.16       | 2.29917    |
| O 006 -- Na 004 | 0.16       | 2.29917    |
| O 022 -- Na 012 | 0.16       | 2.29917    |
| O 014 -- Na 008 | 0.16       | 2.29917    |
| O 014 -- Na 003 | 0.06       | 2.33557    |
| O 006 -- Na 007 | 0.06       | 2.33558    |
| O 030 -- Na 011 | 0.06       | 2.33569    |
| O 022 -- Na 015 | 0.06       | 2.33571    |
| O 002 -- Na 005 | 0.06       | 2.33585    |
| O 026 -- Na 009 | 0.06       | 2.33591    |
| O 010 -- Na 001 | 0.06       | 2.33592    |

|          |        |      |         |
|----------|--------|------|---------|
| O 018 -- | Na 013 | 0.06 | 2.33595 |
| O 020 -- | Na 008 | 0.01 | 2.35002 |
| O 028 -- | Na 004 | 0.01 | 2.35004 |
| O 012 -- | Na 012 | 0.01 | 2.35005 |
| O 032 -- | Na 002 | 0.01 | 2.35005 |
| O 004 -- | Na 016 | 0.01 | 2.35006 |
| O 024 -- | Na 006 | 0.01 | 2.35008 |
| O 016 -- | Na 010 | 0.01 | 2.35008 |
| O 008 -- | Na 014 | 0.01 | 2.35009 |
| O 030 -- | Na 015 | 0.15 | 2.36974 |
| O 014 -- | Na 007 | 0.15 | 2.36975 |
| O 022 -- | Na 011 | 0.15 | 2.36983 |
| O 006 -- | Na 003 | 0.15 | 2.36984 |
| O 002 -- | Na 001 | 0.15 | 2.37015 |
| O 010 -- | Na 005 | 0.15 | 2.37036 |
| O 018 -- | Na 009 | 0.15 | 2.37047 |
| O 026 -- | Na 013 | 0.15 | 2.37053 |
| O 019 -- | Na 016 | 0.13 | 2.42748 |
| O 027 -- | Na 012 | 0.13 | 2.42748 |
| O 011 -- | Na 004 | 0.13 | 2.42749 |
| O 003 -- | Na 008 | 0.13 | 2.42752 |
| O 007 -- | Na 006 | 0.13 | 2.42760 |
| O 015 -- | Na 002 | 0.13 | 2.42762 |
| O 023 -- | Na 014 | 0.13 | 2.42763 |
| O 031 -- | Na 010 | 0.13 | 2.42764 |
| O 029 -- | Na 010 | 0.00 | 2.50480 |
| O 021 -- | Na 014 | 0.00 | 2.50481 |
| O 025 -- | Na 012 | 0.00 | 2.50481 |
| O 017 -- | Na 016 | 0.00 | 2.50483 |
| O 005 -- | Na 006 | 0.00 | 2.50486 |
| O 009 -- | Na 004 | 0.00 | 2.50486 |
| O 001 -- | Na 008 | 0.00 | 2.50487 |
| O 013 -- | Na 002 | 0.00 | 2.50487 |
| O 029 -- | Na 013 | 0.11 | 2.53323 |
| O 021 -- | Na 009 | 0.11 | 2.53340 |
| O 013 -- | Na 005 | 0.11 | 2.53396 |
| O 005 -- | Na 001 | 0.11 | 2.53399 |
| O 017 -- | Na 011 | 0.11 | 2.53576 |
| O 025 -- | Na 015 | 0.11 | 2.53589 |
| O 001 -- | Na 003 | 0.11 | 2.53632 |
| O 009 -- | Na 007 | 0.11 | 2.53633 |

---
